# Supplementary material
Source: PubMed Central journal article supplement (PMC2613673)
Supplement: tpc.108.059808_1.pdf [file tpc.108.059808_1.pdf]

**1**

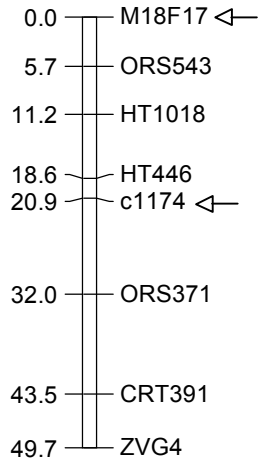

**3**

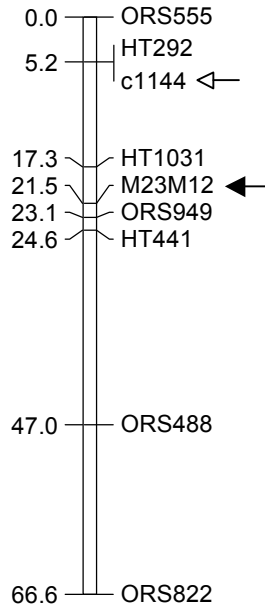

**4**

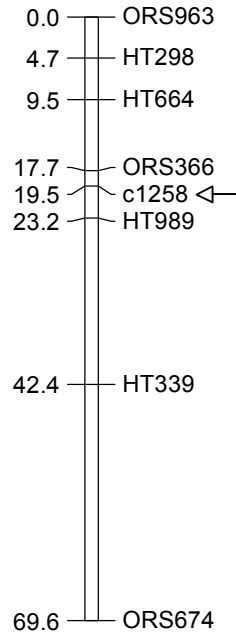

**5**

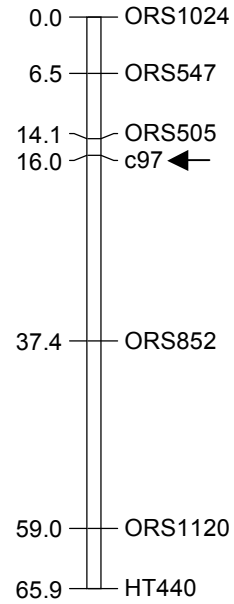

**7**

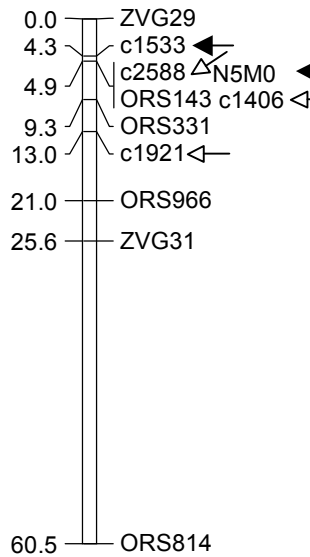

**10**

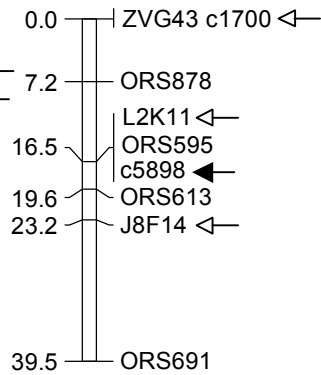

**11**

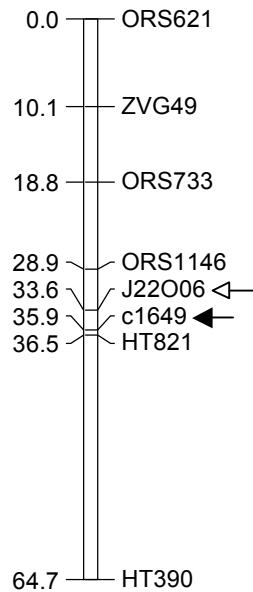

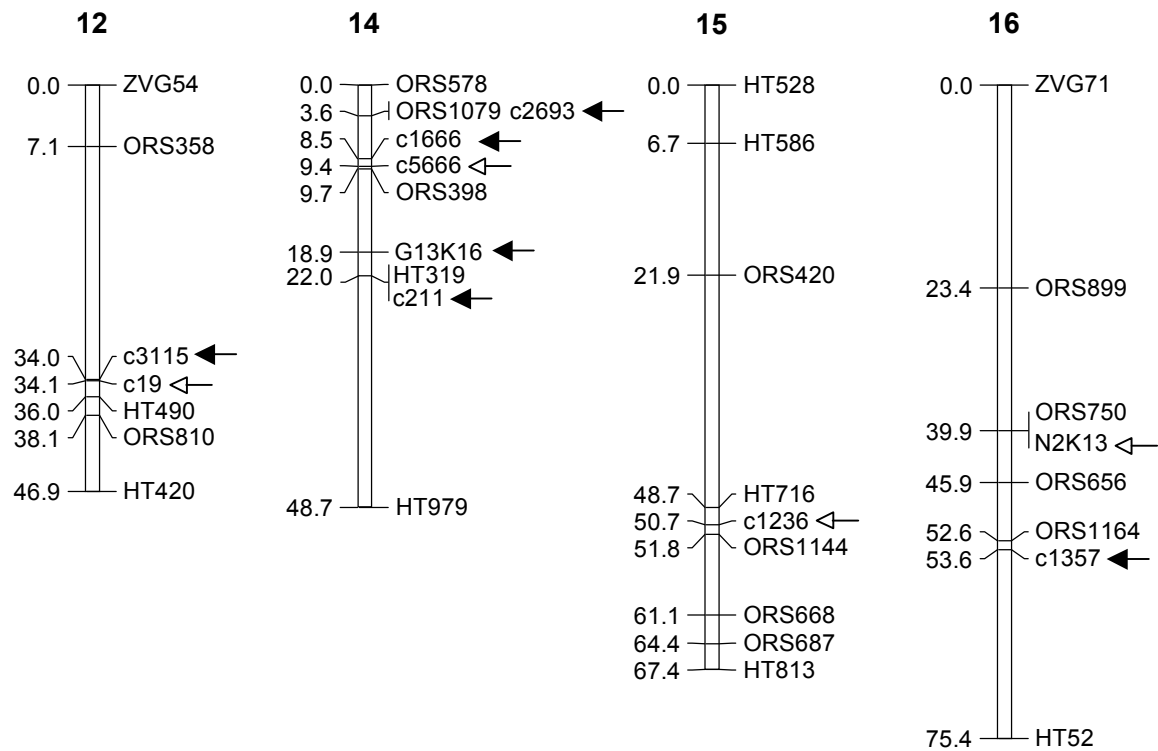

Supplemental figure 1 - Genetic map positions of 12 domestication-related loci (solid arrows) and 15 improvement-related loci (open arrows) in a wild x improved sunflower RIL population.

Supplemental Table 1 - Primers sequences

| <b>Genome Walking</b> |               | walk primer 1             | walk primer 2             |                        |
|-----------------------|---------------|---------------------------|---------------------------|------------------------|
| c1700                 | 5' walk       | CTTGTTCAAGCGTCACAAAAAG    | TAACCGTCTTCAGAGCACAATC    |                        |
| c2150                 | 5' walk       | AATGGTCAAAAACGCAGAGATT    | CCGTGTATCAAAGCCCTAAGAG    |                        |
| c1236                 | 5' walk       | TCCTCAGACATTATTGTCAACAGAG | CACTCTAATTCTACCACCCTCCA   |                        |
| c1236                 | 5' walk 2     | GCTCGATCTGACTCGAAGTTTT    | AACTGGCTCGTTTAAGTTCGAG    |                        |
| c1921                 | 5' walk       | GGTATAGCACAAACCCAATACG    | GGGTAGAACGGCATAGGAAAG     |                        |
| J22006                | 5' walk       | AAATGAAGAGTGCAAGGACCAT    | AGAATAGGCCCAGAACACCATA    |                        |
| J22006                | 3' walk       | ATGGTCCTTGCACCTTTCATTT    | TATGGTGTCTGGGCCTATTCT     |                        |
| H4B03                 | 5' walk       | AAAGTGGACGTGTTGTGTTGAC    | TTGTCAAAAATGAACTCGGTTG    |                        |
| <b>PCR-RFLP</b>       |               | Enzyme                    | Fwd Primer                | Rev Primer             |
| c1666                 |               | <i>SspI</i>               | as SSR                    | as SSR                 |
| c1357                 |               | <i>AluI</i>               | AAAGAACCGTCTTCCAAATGAA    | ACAATCTGCCTTCCAACATTCT |
| c2963                 |               | <i>DdeI</i>               | as SSR                    | as SSR                 |
| c1700                 |               | <i>AluI</i>               | GCCAGCCCAAATTACTGAATTA    | CCCCAAAAACACAATCAAAAAT |
| c1774                 |               | <i>PstI</i>               | ATTCTGCTAAAAAGCCACCAG     | ACGGAATAACATATGGCAAAGC |
| c1921                 |               | <i>PstI</i>               | CGAGAAACCCGTTGATAAAGAA    | CTTTGTCTTCGCTTTTGGATT  |
| J22006                |               | <i>TaqI</i>               | CGATGGTTTTTCATATGGGTTTT   | AAAGAATTCTCCTGCAAATGGA |
| <b>SSCP</b>           |               | Fwd Primer                | Rev Primer                |                        |
| G13K16                |               | ACTGCCATTCCATTTGTCAGG     | AATCATGAAACGCACGTAAAAA    |                        |
| c1236                 |               | as SSR                    | GGCTCTATGGTTCGACTCGTAT    |                        |
| <b>Sequencing</b>     |               | Timing                    | Fwd Primer                | Rev Primer             |
| c1666                 | domestication | GGAGCCGGTTTCTGAATATG      | GGTGCCTGTGTTTCTTCCTC      |                        |
| c4973                 | domestication | ACSGTSAGGACAAGAACAA       | GCCACTTTGTTCAAGTTTAGGG    |                        |
| c5898                 | domestication | TGCTTCAATGGAGTTTAATTCG    | CACAAGAACATGAGGATAAAGTGC  |                        |
| c1236                 | improvement   | TGGACAAAATAAGGTTTGTGG     | TCCTCAGACATTATTGTCAACAGAG |                        |
| c1406                 | improvement   | ACTCAATTGGAATACCCGAATG    | TCGTTTTGATCTAGGAGGTGTG    |                        |
| c1921                 | improvement   | CTGACCGAGAAACCCGTTGATA    | CTTTGTCTTCGCTTTTGGATT     |                        |
| c2016                 | (neutral)     | GGTTGGCGGAGTTTGTAAAG      | GTCATCCCCTTTTTCTTCC       |                        |
| c1351                 | (neutral)     | CCTTCATGGTACACTGCTGGT     | CAAACACCACTTGCCAAAAA      |                        |
| c1111                 | (neutral)     | CGCAGATGAAACACAGGAAACT    | AATATAAATGGACCTCCGCTTGA   |                        |
| c2307                 | (neutral)     | TGCTCTGATGTTTCGTCCAC      | TCAAGCCTTTACACAGTTTAGACA  |                        |
| c25                   | (neutral)     | GCATATCCTTACACGGGGAAA     | CAAATAACAGATGTTTTTGCCATT  |                        |
| c5369                 | (neutral)     | GAACCGTTGTCCGTCTTTGT      | AAAGCAACAGAAGATAGATTTCCA  |                        |
| c5456                 | (neutral)     | ATGGATGGCCAGAAGATCAC      | AATATGCCCAAAGGATGCAG      |                        |

Supplemental Table 2 - Individuals employed in the sequence analysis

| Name                 | Status    | Collection Locale | Plant ID  |
|----------------------|-----------|-------------------|-----------|
| Ames 14400           | Wild      | Arizona           | PI 649851 |
| Ann-1114             | Wild      | Arkansas          | PI 613727 |
| A-1473               | Wild      | Kansas            | PI 413027 |
| A-1572               | Wild      | Mexico-Mayo       | PI 413123 |
| A-1455               | Wild      | Missouri          | PI 413011 |
| Ames 23238           | Wild      | Ohio              | PI 649853 |
| Ames 23940           | Wild      | South Dakota      | PI 649854 |
| Ann-646              | Wild      | Tennessee         | PI 435552 |
| Havasupai            | Primitive |                   | PI 369358 |
| Hidatsa              | Primitive |                   | PI 600721 |
| Hopi                 | Primitive |                   | PI 432504 |
| Maiz Negro           | Primitive |                   | PI 650761 |
| Mandan               | Primitive |                   | PI 600717 |
| Seneca               | Primitive |                   | PI 369360 |
| RHA280               | Improved  |                   | PI 552943 |
| RHA801               | Improved  |                   | PI 599768 |
| cmsHA89              | Improved  |                   | PI 650572 |
| Mennonite            | Improved  |                   | PI 650650 |
| Pervenets            | Improved  |                   | PI 483077 |
| VNIIMK 1646          | Improved  |                   | PI 650385 |
| <i>H. petiolaris</i> | Outgroup  | Texas             | PI 435829 |
